# Supplementary material for: Deep sequencing and transcriptome analysis to identify genes related to biosynthesis of aristolochic acid in Asarum heterotropoides
Source: PubMed Central journal article supplement (PMC6294785; doi:10.1038/s41598-018-36316-0), 2018-12-14
Supplement: 41598_2018_36316_MOESM1_ESM.pdf [file 41598_2018_36316_MOESM1_ESM.pdf]

---

**Deep sequencing and transcriptome analysis to identify genes related to biosynthesis of  
aristolochic acid in *Asarum heterotropoides***

Wang Xiaohan\*, Hui Fang, Yang Yongcheng, and Yang Shihai\*

Traditional Chinese Medicine College, Jilin Agricultural University, Changchun City, Jilin Province  
130118, China

\*Corresponding authors:

Yang Shihai Email address: jlyangs@163.com

Wang Xiaohan Email address: xiaohanw@163.com

Supplemental Table 1. Candidate UniGenes list.

| No. | UniGene ID    | foldChange  | pval      | NR_protein_ID                   |
|-----|---------------|-------------|-----------|---------------------------------|
| 1   | c290059_g1_i1 |             |           | gi 720016627 ref XP_010261209.1 |
| 2   | c215679_g1_i1 | 0           | 8.02E-12  | gi 545354089 ref XP_005642879.1 |
| 3   | c211451_g1_i1 | 0.276567956 | 6.32E-07  | gi 695034052 ref XP_009404519.1 |
| 4   | c199520_g1_i1 | 0.379872428 | 8.01E-06  | gi 720091809 ref XP_010245533.1 |
| 5   | c211451_g1_i2 | 2.704506778 | 0.0000089 | gi 720094733 ref XP_010246457.1 |
| 6   | c215800_g2_i1 | 2.191671051 | 0.0001582 | gi 719982170 ref XP_010250350.1 |
| 7   | c149320_g1_i1 | Inf         | 0.0003981 | gi 747063524 ref XP_011078312.1 |
| 8   | c146272_g1_i2 | Inf         | 0.0006614 | gi 747042923 ref XP_011081001.1 |
| 9   | c377160_g1_i1 | Inf         | 0.0010237 | gi 747040616 ref XP_011090162.1 |
| 10  | c191631_g2_i1 | 0           | 0.0021403 | gi 662502970 gb KEQ60593.1      |
| 11  | c174134_g2_i1 | Inf         | 0.003718  | gi 224143258 ref XP_002324896.1 |
| 12  | c332386_g1_i1 |             |           | gi 586549432 ref XP_006909787.1 |
| 13  | c212240_g1_i1 | 0           | 4.98E-73  | gi 672119786 ref XP_008783141.1 |
| 14  | c212240_g1_i2 | 0.006724043 | 3.81E-39  | gi 672119786 ref XP_008783141.1 |
| 15  | c213637_g1_i1 | 20.12522497 | 2.04E-36  | gi 930809514 gb ALG05139.1      |
| 16  | c213648_g2_i1 | 0.053638064 | 6.78E-25  | gi 116247551 gb ABJ90144.1      |
| 17  | c196437_g2_i1 | Inf         | 7.24E-22  | gi 1024042478 gb KZV45880.1     |
| 18  | c211478_g1_i3 | 13.434884   | 1.47E-17  | gi 930809514 gb ALG05139.1      |
| 19  | c196437_g2_i2 | Inf         | 1.25E-06  | gi 1024042478 gb KZV45880.1     |
| 20  | c213312_g1_i1 |             |           | gi 720091108 ref XP_010245321.1 |
| 21  | c217593_g1_i1 | 267.58737   | 6.05E-21  | gi 720070894 ref XP_010277895.1 |
| 22  | c50470_g1_i1  | 0.009567    | 5.27E-06  | gi 720070894 ref XP_010277895.1 |
| 23  | c42003_g1_i1  | Inf         | 1.45E-07  | gi 936413435 gb KPM41887.1      |
| 24  | c213390_g1_i3 | 167.73644   | 3.14E-30  | gi 802650549 ref XP_012079991.1 |
| 25  | c202205_g1_i1 | 190.33893   | 2.96E-16  | gi 747068716 ref XP_011081126.1 |
| 26  | c185071_g1_i1 | Inf         | 0.0000227 | gi 747106016 ref XP_011101289.1 |
| 27  | c198638_g1_i1 | 2.0703861   | 0.0004164 | gi 359495915 ref XP_002273532.2 |
| 28  | c99956_g1_i1  | Inf         | 0.0015673 | gi 747106016 ref XP_011101289.1 |
| 29  | c167169_g2_i1 |             |           | gi 629122181 gb KCW86671.1      |
| 30  | c213390_g1_i6 |             |           | gi 720064068 ref XP_010275835.1 |
| 31  | c159791_g1_i1 | 41.383647   | 1.20E-32  | gi 747097360 ref XP_011096642.1 |
| 32  | c192979_g1_i1 |             |           | gi 743777069 ref XP_010918954.1 |
| 33  | c217593_g1_i1 | 267.58737   | 6.05E-21  | gi 720070894 ref XP_010277895.1 |
| 34  | c218419_g2_i3 | 14.916523   | 2.93E-23  | gi 720090665 ref XP_010245171.1 |

Supplemental Table 2. FPKM and the counts of candidate UniGenes.

| No. | FPKM   |        |        |        |        |        | counts |        |        |        |        |        |
|-----|--------|--------|--------|--------|--------|--------|--------|--------|--------|--------|--------|--------|
|     | leaf-1 | leaf-2 | leaf-3 | root-1 | root-2 | root-3 | leaf-1 | leaf-2 | leaf-3 | root-1 | root-2 | root-3 |
| 1   | 16.11  | 20.61  | 21.6   | 82.05  | 84.25  | 83.47  | 356    | 467    | 461    | 2208   | 1821   | 1959   |
| 2   | 2.37   | 5.07   | 2.9    | 0      | 0      | 0      | 50     | 110    | 59.25  | 0      | 0      | 0      |
| 3   | 20.04  | 14.81  | 23.59  | 1.73   | 5.85   | 8.18   | 206.2  | 156.3  | 235.8  | 21.39  | 57.74  | 87.65  |
| 4   | 34.79  | 40.32  | 38.34  | 12.86  | 13.23  | 15     | 848    | 1008   | 902    | 382    | 316    | 389    |
| 5   | 8.61   | 10.81  | 6.09   | 23     | 21.8   | 21.13  | 215.8  | 277.7  | 147.2  | 702.6  | 535.3  | 563.4  |
| 6   | 52.83  | 58.49  | 64.46  | 120.1  | 125.1  | 121.7  | 1300   | 1476   | 1531   | 3602   | 3016   | 3185   |
| 7   | 0      | 0      | 0      | 0.95   | 1.4    | 0.74   | 0      | 0      | 0      | 12     | 14     | 8      |
| 8   | 0      | 0      | 0      | 0.75   | 0.79   | 0.53   | 0      | 0      | 0      | 13     | 11     | 8      |
| 9   | 0      | 0      | 0      | 1.22   | 1.54   | 1.04   | 0      | 0      | 0      | 11     | 11     | 8      |
| 10  | 0.43   | 1.68   | 0.67   | 0      | 0      | 0      | 4      | 16     | 6      | 0      | 0      | 0      |
| 11  | 0      | 0      | 0      | 0.29   | 1.18   | 0.59   | 0      | 0      | 0      | 4      | 13     | 7      |
| 12  | 0.17   | 0.27   | 0.12   | 0.14   | 0.4    | 0.11   | 3      | 5      | 2      | 3      | 7      | 2      |
| 13  | 37.47  | 37.55  | 41.12  | 0      | 0      | 0      | 872.7  | 896.9  | 924.5  | 0      | 0      | 0      |
| 14  | 23.32  | 26.19  | 16.96  | 0.07   | 0.18   | 0.17   | 516.9  | 595.3  | 362.9  | 2      | 4      | 4      |
| 15  | 4.97   | 6.33   | 2.75   | 92.97  | 92.79  | 83.8   | 163    | 213    | 87     | 3725   | 2993   | 2936   |
| 16  | 94.52  | 103.1  | 67.42  | 4.89   | 4.99   | 3.82   | 1387   | 1552   | 958    | 87     | 71     | 59     |
| 17  | 0      | 0      | 0      | 4.94   | 5.51   | 4.04   | 0      | 0      | 0      | 104    | 93     | 74     |
| 18  | 1.22   | 0.73   | 0.54   | 12.11  | 10.04  | 9.98   | 21     | 13     | 9      | 253.9  | 168.7  | 182.1  |
| 19  | 0      | 0      | 0      | 1.29   | 0.68   | 1.37   | 0      | 0      | 0      | 26     | 11     | 24     |
| 20  | 20.44  | 34.22  | 15.76  | 20.83  | 19.14  | 18.22  | 639    | 1097   | 475    | 795    | 588    | 608    |
| 21  | 0.04   | 0      | 0      | 2.7    | 3.99   | 4.03   | 1      | 0      | 0      | 79     | 94     | 103    |
| 22  | 16.05  | 17.7   | 50.01  | 0.11   | 0.25   | 0.39   | 458    | 518    | 1377   | 4      | 7      | 12     |
| 23  | 0      | 0      | 0      | 0.96   | 0.77   | 0.99   | 0      | 0      | 0      | 28     | 18     | 25     |
| 24  | 0.08   | 0      | 0      | 4.77   | 4.68   | 3.68   | 2.92   | 0      | 0      | 214.1  | 169.3  | 144.5  |
| 25  | 0.03   | 0      | 0      | 2.05   | 1.87   | 1.31   | 1      | 0      | 0      | 86.98  | 64     | 48.54  |
| 26  | 0      | 0      | 0      | 1.1    | 1.15   | 0.99   | 0      | 0      | 0      | 18     | 15     | 14     |
| 27  | 47.97  | 48.46  | 53.93  | 96.33  | 101    | 97.03  | 2344   | 2428   | 2537   | 5760   | 4871   | 5082   |
| 28  | 0      | 0      | 0      | 0.31   | 0.52   | 0.39   | 0      | 0      | 0      | 8      | 11     | 9      |
| 29  | 6.61   | 6.46   | 4.54   | 3.6    | 0.81   | 2.28   | 10     | 10     | 7      | 6      | 1      | 3      |
| 30  | 9.08   | 9.07   | 11.06  | 6.99   | 7.94   | 8.65   | 273.2  | 279.8  | 320.8  | 256.6  | 234.6  | 277.4  |
| 31  | 0      | 0      | 0      | 7.63   | 6.38   | 5.04   | 0      | 0      | 0      | 222    | 149    | 128    |
| 32  | 6.47   | 6.39   | 4.6    | 6.53   | 6.48   | 6.59   | 156    | 158    | 107    | 192    | 153    | 169    |
| 33  | 0.04   | 0      | 0      | 2.7    | 3.99   | 4.03   | 1      | 0      | 0      | 79     | 94     | 103    |
| 34  | 2.02   | 1.96   | 0.12   | 18.9   | 21.21  | 18.81  | 38.15  | 37.82  | 2.11   | 432.9  | 389.8  | 375.3  |

Supplemental Table 3. Relative expression of *TyrDCs*

|               | Leaf          | Root          |
|---------------|---------------|---------------|
| <i>TyrDC1</i> | 5.225 ± 0.445 | 2.579 ± 0.499 |
| <i>TyrDC2</i> | 5.661 ± 0.377 | 2.838 ± 0.319 |
| <i>TyrDC3</i> | 5.083 ± 0.584 | 2.537 ± 0.531 |

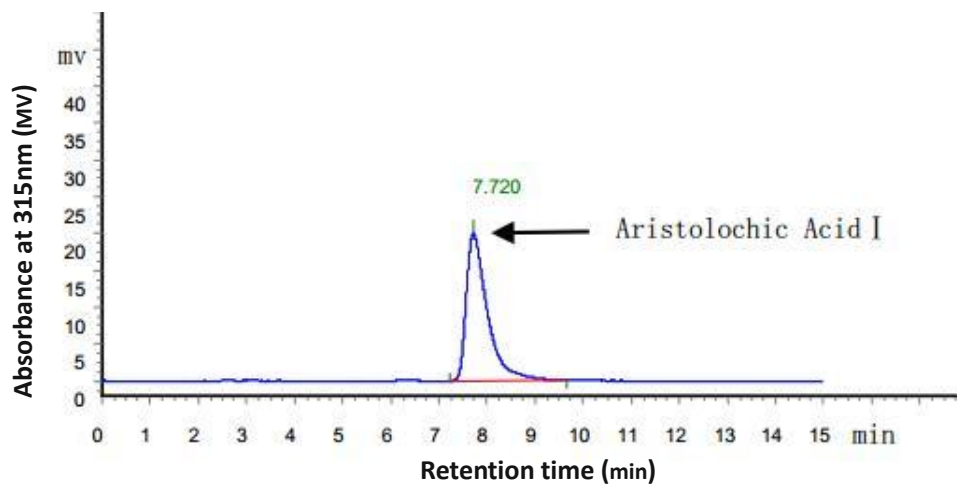

Supplemental Figure 1. HPLC determination of Aristolochic acid I standard. The marker “←” indicates Aristolochic acid I with a retention time of about 7.720 min.
